# Supplementary material for: A railway monitoring data sharing incentive scheme based on reputation value and smart contracts
Source: PeerJ journal article supplement (doi:10.7717/peerj-cs.3442), 2025-12-16
Supplement: Appendice_A.docx [file Appendice_A.docx]

**A ：Analysis of the direction of evolution of the railroad regulatory authority**

Based on the above analysis, the replication dynamic equation for the application strategy of the railroad regulator is:

The first order derivatives of x and the set G(y) are respectively:

It follows from the stability theorem for the replicated dynamic equations:

1. If (notation )，Then , The Railroad Regulator's trading strategy is a stable strategy that does not change over time.
2. If according to the relationship between y and y*, when,,, at this point x = 0 is the evolutionary stabilization point, it indicates that when the probability of a railroad regulatory platform choosing strict regulation is lower than y*, the railroad regulatory platform prefers non-strict regulation.
3. When,, At this point x = 1 is the evolutionary stabilization point, It shows that when the probability of monitoring platform sharer A choosing honest sharing is greater than y*, the railroad regulatory platform tends to strictly regulate. The phase diagram of the strategy evolution of the railroad regulatory platform is shown in Fig. 1-3. The upper half of the curve indicates that the railroad regulatory platform tends to strict regulation, and the lower half of the curve indicates that the railroad regulatory platform tends to non-strict regulation.

Fig. 1-3 Phase diagram of strategy evolution of railway supervision platform

**B :Monitoring Data Sharing Party A Evolutionary Path Analysis**

Based on the above analysis, the replication dynamic equation for monitoring the sharing strategy of data sharer A is:

The first order derivatives of y and the set J(z) are respectively:

It follows from the stability theorem for the replicated dynamic equations:

1. If , (notation ), then

The trading strategy of the trading platform is a stable strategy that does not change over time.

1. If , by the relationship between z and z* , when , , , At this point, y = 0 is the evolutionary stability point, i.e., when the probability that monitoring data sharer B chooses honest sharing is lower than z*, monitoring data sharer A tends to choose non-honest sharing.
2. If , , , At this point, is the evolutionary stability point, i.e., when the probability that monitoring data sharer B chooses honesty is higher than z*, monitoring data sharer A tends to choose honest sharing.

The phase diagram of the strategy evolution of the transaction requesting party can be obtained, as shown in Fig. 1-4. In the upper half region of the surface, y tends to be 1, and the monitoring data sharing party A tends to share honestly; in the lower half region of the surface, y tends to be 0, and the transaction requesting party tends to be dishonest.

Fig. 1-4 Phase diagram of strategy evolution for monitoring data sharing party A

**C: Monitoring data sharer B evolution path analysis**

With the above analysis, the replication dynamic equation for monitoring the sharing strategy of data sharer B is:

The first-order derivatives of z and the setup are, respectively:

It follows from the stability theorem for the replicated dynamic equations:

1. If (notation ), then , The trading strategy of the trading platform is a stable strategy that does not change over time.
2. If , Based on the relationship between x and x*. When , , , is the evolutionary stability point, i.e., when the probability that the railroad regulatory platform chooses strict regulation is lower than z*, the monitoring data sharer B tends to choose dishonest sharing.
3. If ,,,then is the evolutionary stability point, i.e., when the probability that the railroad regulatory platform chooses strict regulation is higher than z*, the monitoring data sharer B tends to choose honest sharing.

The phase diagram of the strategy evolution of the intended transferee can be obtained, as shown in Fig. 1-5. In the region of the first half of the surface, z tends to 1, monitoring that data sharing party B tends to share honestly; when in the second half of the surface, z tends to 0, monitoring that data sharing party B tends to share dishonestly.

Fig. 1-5 Phase diagram of strategy evolution for monitoring data sharing party B

D: **Jacobi Matrix:**
