# Supplementary material for: A railway monitoring data sharing incentive scheme based on reputation value and smart contracts
Source: PeerJ journal article supplement (doi:10.7717/peerj-cs.3442), 2025-12-16
Supplement: fig6_data.csv [file fig6_data.csv]

## Sheet: Sheet1
Experimental Group	k₁ Value	Corresponding Rep Value	Resulting Evolutionary Stable Strategy (ESS)	Strategy Description
1	0.8	0.4	{1，1，1}	{Strict Regulation, Honest Sharing, Honest Sharing}
1	1	0.5	{1，0，0}	{Strict Regulation, Non-Honest Sharing, Non-Honest Sharing}
1	1.2	0.6	{1，0，0}	{Strict Regulation, Non-Honest Sharing, Non-Honest Sharing}
2	1	0.5	{1，0，0}	{Strict Regulation, Non-Honest Sharing, Non-Honest Sharing}
2	1.2	0.6	{1，0，0}	{Strict Regulation, Non-Honest Sharing, Non-Honest Sharing}
2	1.6	0.8	{1，0，0}	{Strict Regulation, Non-Honest Sharing, Non-Honest Sharing}
3	0.4	0.2	{1，1，1}	{Strict Regulation, Honest Sharing, Honest Sharing}
3	0.6	0.3	{1，1，1}	{Strict Regulation, Honest Sharing, Honest Sharing}
3	0.8	0.4	{1，1，1}	{Strict Regulation, Honest Sharing, Honest Sharing}
