# Supplementary material for: A railway monitoring data sharing incentive scheme based on reputation value and smart contracts
Source: PeerJ journal article supplement (doi:10.7717/peerj-cs.3442), 2025-12-16
Supplement: fig8_data.csv [file fig8_data.csv]

## Sheet: Sheet1
Experimental Group	N Value	Resulting Evolutionary Stable Strategy (ESS)	Strategy Description
1	50	{1，1，1}	{Strict Regulation, Honest Sharing, Honest Sharing}
1	100	{1，1，1}	{Strict Regulation, Honest Sharing, Honest Sharing}
1	150	{1，1，1}	{Strict Regulation, Honest Sharing, Honest Sharing}
2	50	{0，1，1}	{Ordinary Regulation, Honest Sharing, Honest Sharing}
2	100	{1，0，0}	{Strict Regulation, Honest Sharing, Non-Honest Sharing }
2	150	{1，0，0}	{Strict Regulation, Non-Honest Sharing, Non-Honest Sharing}
